# Supplementary material for: Photonic crystal barcodes assembled from dendritic silica nanoparticles for the multiplex immunoassays of ovarian cancer biomarkers
Source: Royal Society of Chemistry journal article supplement (doi:10.1039/d1ay01658j), 2021-12-14
Supplement: d1ay01658j1.pdf [file d1ay01658j1.pdf]

## Supporting Information

### Photonic crystal barcodes assembled by dendritic silica nanoparticles for the multiplex immunoassays of ovarian cancer

Dan-Dan Ji<sup>a</sup>, Mei-Xia Wu<sup>b</sup>, Shou-Nian Ding<sup>\*a</sup>

<sup>a</sup> *Jiangsu Province Hi-Tech Key Laboratory for Bio-medical Research, School of Chemistry and Chemical Engineering, Southeast University, Nanjing 211189, China*

<sup>b</sup> *Lianshui People's Hospital, Jiangsu 223400, China.*

\*Corresponding authors. (S.-N. Ding) Fax: (+86) 25-52090621.

E-mail: snding@seu.edu.cn

# Contents

| <b>Experimental part</b>                                                                                     | <b>page</b> |
|--------------------------------------------------------------------------------------------------------------|-------------|
| Reagents and chemicals                                                                                       | 3           |
| Synthesist of CdTe QDs                                                                                       | 3           |
| Bioconjugation of CdTe QDs with Ab <sub>2</sub>                                                              | 3           |
| <b>Results and discussion</b>                                                                                |             |
| Scheme S1 Schematic of collection of lights from the refecton and fluorescence                               | 4           |
| Fig S1 Illustration of the T-shaped microfluidic device for the fabrication of photonic crystal microspheres | 5           |
| Table S1 Particle size and pore size data of dendritic silica particles                                      | 5           |
| Figure S2 TEM image and FL spectra of CdTe QDs                                                               | 6           |
| Figure S3 The blocking effect of blocking agent                                                              | 6           |
| Figure S4 Fluorescence resulted images at different AFP concentration                                        | 7           |
| Figure S5 Fluorescence resulted images at different CEA concentration                                        | 7           |
| Figure S6 Fluorescence resulted images at different CA125 concentration                                      | 7           |
| Figure S7 Stability of dSiO <sub>2</sub> PhC beads array                                                     | 8           |
| Figure S8 Reproducibility of dSiO <sub>2</sub> PhC beads array                                               | 8           |
| Figure S9 Results of human serum spiked                                                                      | 8           |
| <b>Reference</b>                                                                                             | 9           |

## Reagents and chemicals

3-mercaptopropionic acid (MPA,  $\geq 98\%$ ) was obtained from Aladdin Technology Co., Ltd. Tellurium (Te, 99.9%), sodium borohydride ( $\text{NaBH}_4$ ,  $\geq 96\%$ ), cadmium chloride ( $\text{CdCl}_2 \cdot 2.5\text{H}_2\text{O}$ , 99.0%), sodium hydroxide ( $\text{NaOH}$ ,  $\geq 96\%$ ), sodium dihydrogen phosphate dihydrate ( $\text{NaH}_2\text{PO}_4 \cdot 2\text{H}_2\text{O}$ ,  $\geq 99\%$ ) and disodium hydrogen phosphate dodecahydrate ( $\text{Na}_2\text{HPO}_4 \cdot 12\text{H}_2\text{O}$ ,  $\geq 99\%$ ) were provided from Sinopharm Chemical Reagent Co., Ltd. Phosphate buffer saline (PBS, 0.1 M, pH 7.4), phosphate buffer saline tween-20 (PBST, 0.05% tween-20 in the PBS) were self-prepared. Double distilled water was used throughout the experiment. All reagents were purified without further purification.

## Synthesis of CdTe QDs

The carboxylated CdTe quantum dots were prepared according to the literature.<sup>1</sup> Briefly, 67.0  $\mu\text{L}$  of MPA and 91.3 mg of  $\text{CdCl}_2 \cdot 2.5\text{H}_2\text{O}$  were dissolved in 40 mL of  $\text{H}_2\text{O}$ . The pH of solution was adjusted to 11.0 using 1.0 M  $\text{NaOH}$ . Under stirring with  $\text{N}_2$ , the 1.0 mL of 0.04 M  $\text{NaHTe}$  solution (produced by the reaction of oxygen-free  $\text{NaBH}_4$  solution with Te powder under  $\text{N}_2$  atmosphere) was added to this solution at room temperature. Then the solution was refluxed at 100  $^\circ\text{C}$  for several hours. The obtained CdTe products were precipitated for three times by ethanol with centrifugation at 10,000 rpm for 10 min.

## Bioconjugation of CdTe-labeled Ab<sub>2</sub>

The preparation of CdTe QDs conjugated antibodies is not much different from previous reports.<sup>2,3</sup> First, freshly prepared EDC (150  $\mu\text{L}$ , 4.2 mg/mL) solution was used to activate the carboxyl groups on the surface of CdTe (150  $\mu\text{L}$ , 5 mg/mL) (shaking for 15 minutes). Then, CEA-Ab<sub>2</sub> (500  $\mu\text{L}$ , 26  $\mu\text{g}/\text{mL}$ ) was added to the above uniformly mixed solution and shaken for 2 hours in a dark environment at room temperature. To remove unconjugated QDs and byproduct, the resulting product was purified by ultrafiltration using a 50 KD filter (3000 g for 10 min). Finally, the non-specific active sites on the purified CdTe-CEA Ab<sub>2</sub> were blocked with 1% BSA in PBS (containing 2% NaCl). The preparation of CdTe QDs coupling CA125-Ab<sub>2</sub> (500  $\mu\text{L}$ , 25  $\mu\text{g}/\text{mL}$ ) and AFP-Ab<sub>2</sub> (500  $\mu\text{L}$ , 33  $\mu\text{g}/\text{mL}$ ) is the same as above.

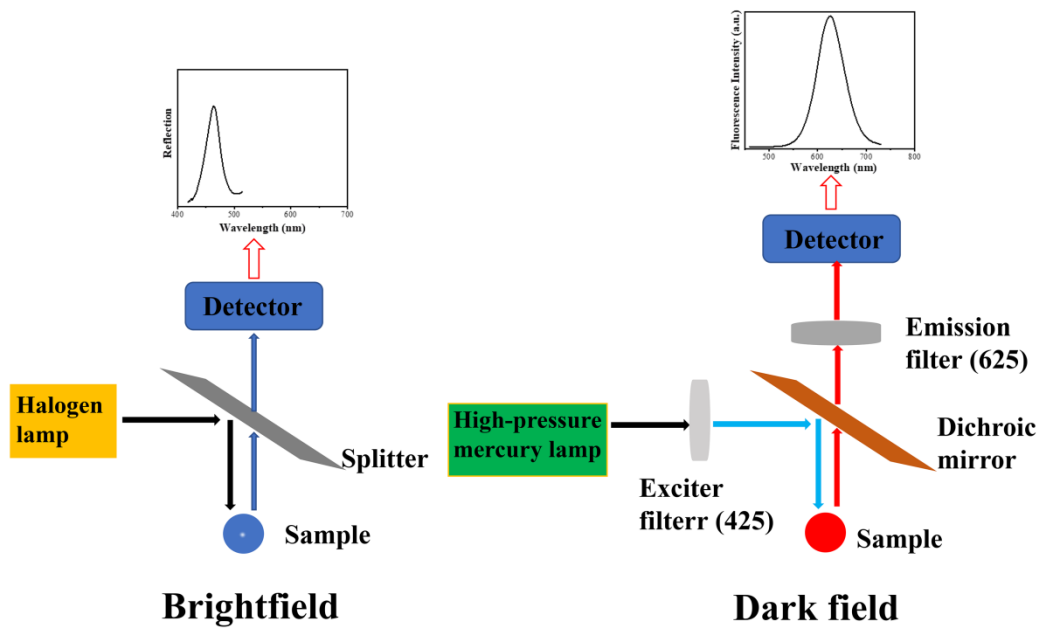

**Scheme S1** Schematic of collection of lights from the reflection and fluorescence.

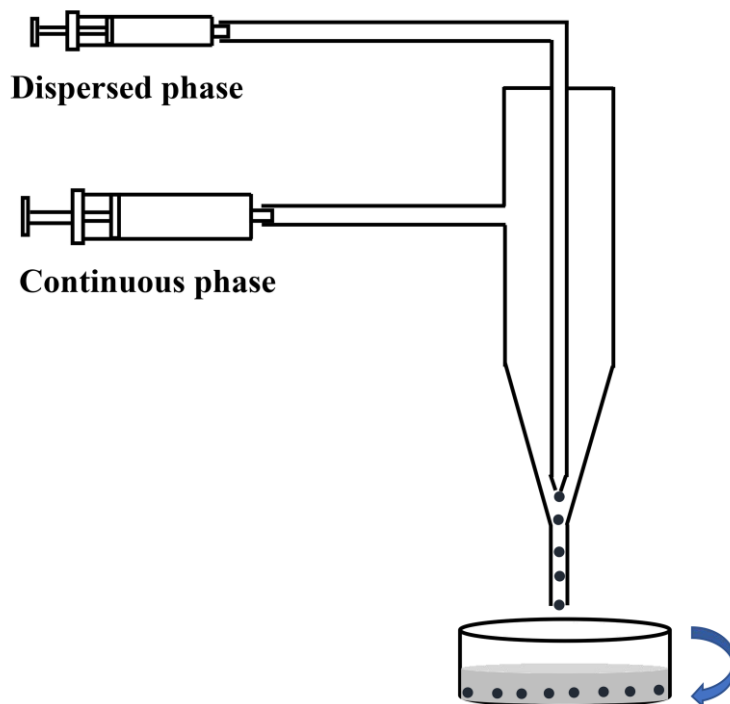

**Fig. S1** Illustration of the T-shaped microfluidic device for the fabrication of photonic crystal microspheres. The dispersed phase was injected via a needle positioned along the main axis of the T-junction. The continuous phase was injected through the perpendicular inlet to the main channel of the T-junction.

Table S1 Particle size and pore size data of dendritic silica particles

|                            | dSiO <sub>2</sub> -1 | dSiO <sub>2</sub> -2 | dSiO <sub>2</sub> -3 |
|----------------------------|----------------------|----------------------|----------------------|
| Average particle size (nm) | 242                  | 274                  | 330                  |
| Average pore size (nm)     | 22.45                | 17.91                | 24.38                |

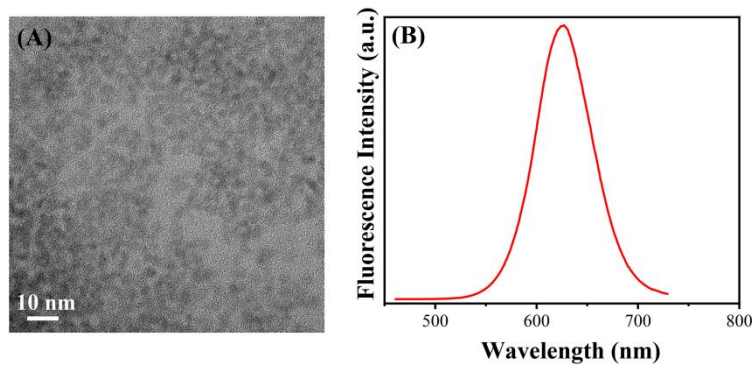

**Fig. S2** (A) TEM image of CdTe QDs. (B) Fluorescence emission spectra of CdTe QDs ( $\lambda_{\text{ex}}=365$  nm).

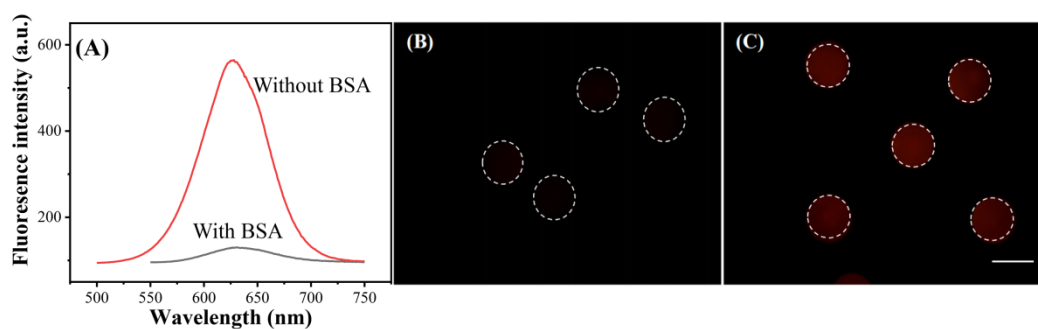

**Fig. S3** The blocking effect of blocking agent. (A) Fluorescence signal of capture antibody ( $\text{Ab}_1$ ) immobilized  $\text{dSiO}_2$  PhC beads. (B) The  $\text{dSiO}_2$  PhC beads modified with capture antibody ( $\text{Ab}_1$ ) were incubated with 5% BSA in PBS for 2 h, and then incubated with CdTe-labeled  $\text{Ab}_2$  for 25 min. The beads were thoroughly washed with PBS and PBST. (C) The capture antibody ( $\text{Ab}_1$ )-modified  $\text{dSiO}_2$  PhC beads were directly incubated with CdTe-labeled  $\text{Ab}_2$  for 25 min. The beads were thoroughly washed with PBS and PBST. The scale in the picture is 200  $\mu\text{m}$ .

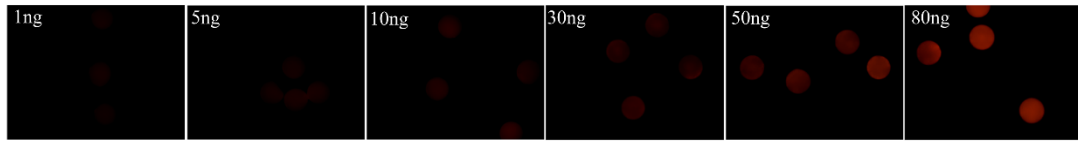

**Fig. S4** Fluorescence resulted images at different AFP concentration using dSiO<sub>2</sub> PhC beads as carrier.

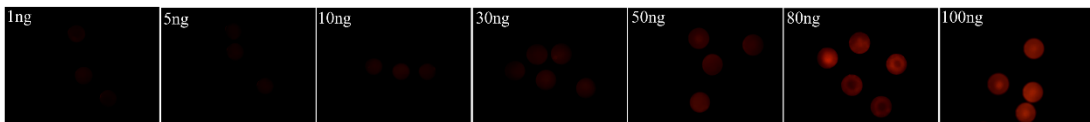

**Fig. S5** Fluorescence resulted images at different CEA concentration using dSiO<sub>2</sub> PhC beads as carrier.

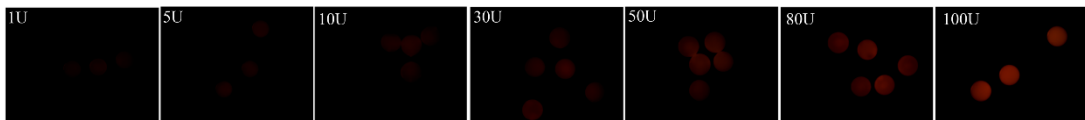

**Fig. S6** Fluorescence resulted images at different CA125 concentration using dSiO<sub>2</sub> PhC beads as carrier.

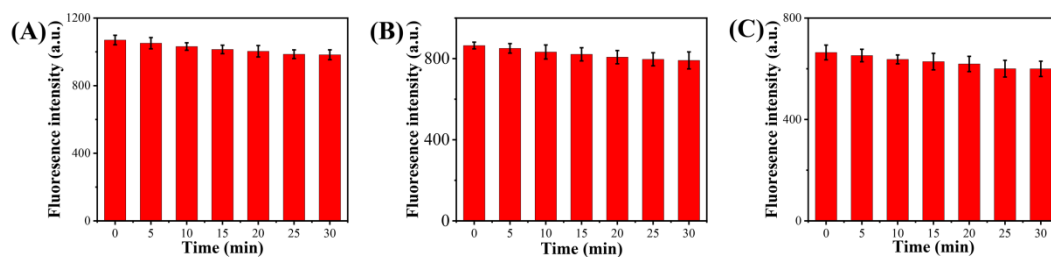

**Fig. S7** Stability of (A) AFP, (B) CEA and (C) CA125 based on  $dSiO_2$  PhC beads array. The error bars were obtained from three experiments.

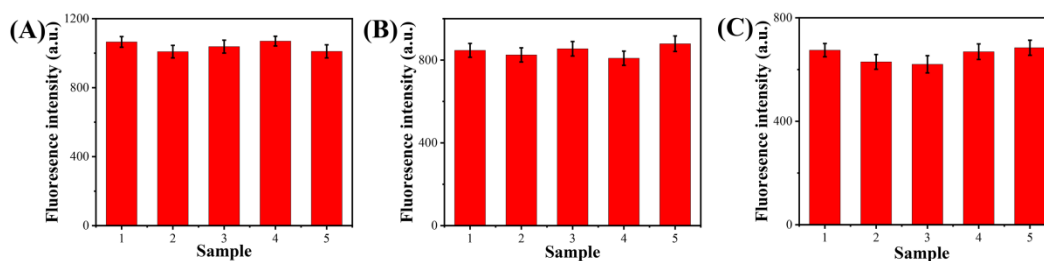

**Fig. S8** Reproducibility of (A) AFP, (B) CEA and (C) CA125 based on  $dSiO_2$  PhC beads array. The error bars were obtained from three experiments.

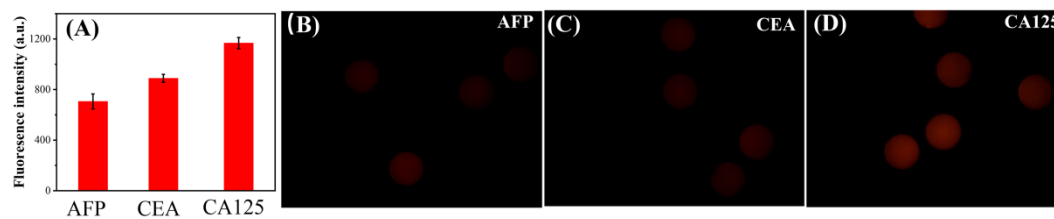

**Fig. S9** The average fluorescence intensity of AFP, CEA, and CA125 from the three spiked sera. The error bars were obtained from three experiments.



## References

1. L. Zou, Z. Gu, N. Zhang, Y. Zhang, Z. Fang, W. Zhu and X. Zhong, *J. Mater. Chem.*, 2008, **18**, 2807-2815.
2. E. Song, M. Yu, Y. Wang, W. Hu, D. Cheng, M. T. Swihart and Y. Song, *Biosens. Bioelectron.*, 2015, **72**, 320-325.
3. X.-L. Liang, J.-X. Liu, Y.-J. Jiao, J. Zhu and S.-N. Ding, *Anal. Methods*, 2019, **11**, 4197-4203.
